Furthermore, Drs. Sum-Ping and Mehta's assumptions about inspired gas temperatures,<sup>9</sup> expired gas humidity,<sup>10</sup> and the formula they use to estimate vapor mass<sup>11</sup> are incorrect. In any case, absolute inspired gas humidity is only important for its ability to decrease respiratory heat loss. Because we directly measured central temperature, we can conclude (without calculations) that both passive and active airway humidification minimize hypothermia.

In summary, both active and passive airway humidification provides sufficient moisture to prevent tracheal ciliary damage. Heat and moisture exchangers are about half as effective as active systems in preventing central hypothermia in anesthetized infants and children. Passive systems are, however, considerably less expensive and much easier to use than the active ones.

DANIEL I. SESSLER, M.D.  
*Assistant Professor of Anesthesia  
Department of Anesthesia  
University of California, San Francisco  
513 Parnassus Avenue  
San Francisco, California 94143*

BRUNO BISSONNETTE, M.D.  
*Assistant Professor of Anesthesia  
Department of Anesthesia  
Hospital for Sick Children  
555 University Avenue  
Toronto, Ontario  
Canada, M4Y 2W1*

## REFERENCES

1. Forbes AR: Humidification and mucus flow in the intubated trachea. *Br J Anaesth* 45:874-878, 1973
2. Chalon J, Loew DAY, Malebranche J: Effects of dry anesthetic gases on tracheobronchial ciliated epithelium. *ANESTHESIOLOGY* 37:338-343, 1972
3. Chalon J: Low humidity and damage to tracheal mucosa. *Bull N Y Acad Med* 56:314-322, 1980
4. Forbes AR: Temperature, humidity and mucus flow in the intubated trachea. *Br J Anaesth* 46:29-34, 1974
5. Noguchi H, Takumi Y, Aochi O: A study of humidification in tracheostomized dogs. *Br J Anaesth* 45:844-848, 1973
6. Mercke U: The influence of varying air humidity on mucociliary activity. *Acta Otolaryngol* 79:133-139, 1975
7. Revenas B, Lindholm CE: The foam nose—A new disposal heat and moisture exchanger. A comparison with other similar devices. *Acta Anaesthesiol Scand* 23:34-39, 1979
8. Ogino M, Kopotic R, Mannino FL: Moisture-conserving efficiency of condenser humidifiers. *Anaesthesia* 40:990-995, 1985
9. Mebius C: A comparative evaluation of disposable humidifiers. *Acta Anaesthesiol Scand* 27:403-409, 1983
10. McCutchan JW, Taylor CL: Respiratory heat exchange with varying temperature and humidity of inspired air. *J Appl Physiol* 4:121-135, 1951
11. Tilling SE, Hancox AJ, Hayes B: An accurate method of measuring medical humidifier output. *Clin Phys Physiol Meas* 4:197-209, 1983

(Accepted for publication December 6, 1989.)

## Preoperative Fasting of Children

*To the Editor:*—I read with concern the paper by Sandhar *et al.*<sup>1</sup> in which it was suggested that children may be given an unspecified amount of oral fluid 2.25 h before surgery without increasing the risk of pulmonary aspiration of gastric contents. This conclusion was largely based on the finding that a small volume of oral fluid (5 ml/kg) given to a limited number of patients 2-3 h preoperatively failed to produce a clinically significant increase in the gastric aspirate at induction of anesthesia. Moreover, 58% of patients given a drink received oral ranitidine, which reduced gastric volume, compared with 44% of patients who maintained their fast.

A further problem with Sandhar *et al.*'s paper is the reference to a study by Miller *et al.*<sup>2</sup> These authors claimed to have shown that giving gynecologic patients tea and toast 2-3 h preoperatively did not increase the volume of gastric contents at induction of anaesthesia. However, careful reading of the paper reveals that ten of their 23 "fed" patients had actually fasted more than 4 h and the mean fasting time for the group was 3.8 h.

In a previous study we showed that 10 ml/kg of oral fluid given 2-4 h preoperatively to unpremedicated children did produce a clinically significant increase in the residual gastric volume at induction of anesthesia.<sup>3</sup> Unless more substantial evidence can be produced to refute this, it would seem imprudent to abandon the established practice of withholding fluids from children for a minimum of 4 h preoperatively.

G. MEAKIN

*Lecturer in Pediatric Anesthesia  
Royal Manchester Children's Hospital  
Pendlebury, Manchester M27 1HA  
England*

## REFERENCES

1. Sandhar BK, Goresky GV, Maltby JR, Shaffer EA: Effect of oral liquids and ranitidine on gastric fluid volume and pH in children undergoing outpatient surgery. *ANESTHESIOLOGY* 71:327-330, 1989
2. Miller M, Wishart HY, Nimmo WS: Gastric contents at induction of anaesthesia. Is a 4-hour fast necessary? *Br J Anaesth* 55:1185-1187, 1983
3. Meakin G, Dingwall AE, Addison GM: Effects of fasting and oral premedication on the pH and volume of gastric aspirate in children. *Br J Anaesth* 59:678-682, 1987

(Accepted for publication December 21, 1989.)
